# Supplementary material for: Assessment of the Effects of Student Response Systems on Student Learning and Attitudes over a Broad Range of Biology Courses
Source: Atypon-hosted journal article supplement (doi:10.1187/cbe.06-09-0190), 2007-03-01
Supplement: appendix_a.pdf [file appendix_a.pdf]

## **Appendix A**

Survey Questions. Each survey question is shown along with its associated answer categories. Italicized notes indicate which answer categories were pooled during Chi<sup>2</sup> analyses to maintain subsample sizes.

### ***General Value***

- 1) Overall, I found the clickers to be
  - a) a great addition to the class
  - b) an OK addition to the class
  - c) a distraction from the class
  - d) very detrimental to my learning in this class

*note: Answers c & d were combined to maintain sufficient subsample sizes for Chi<sup>2</sup> analyses.*

- 2) I would recommend a clicker class to a friend.
  - a) yes, absolutely
  - b) I don't think it matters if clickers are used or not
  - c) No, I would tell them to avoid clickers
- 3) The cost of purchasing and registering the clicker was worth it
  - a) yes
  - b) probably
  - c) no

### ***Specific Benefits of Clickers***

- 4) The clickers kept me more interested during lecture.
  - a) strongly agree
  - b) agree
  - c) neither agree nor disagree
  - d) disagree
- 5) The clickers made it more likely that I would attend class.
  - a) strongly agree
  - b) agree
  - c) no, I would have come anyway
  - d) no, they did not motivate me to attend class
- 6) The clickers helped me understand and/or learn the material better
  - a) strongly agree
  - b) agree
  - c) neither agree nor disagree
  - d) disagree

### ***How Should We Use Clickers?***

- 7) How many clicker questions do you recommend per class period
  - a) none

- b) one or two
- c) three or four
- d) five or six

*note: Answers a & b were combined to maintain sufficient subsample sizes for Chi<sup>2</sup> analyses.*

- 8) The number of clicker points to be earned is
- a) too high
  - b) about right
  - c) too low
- 9) I prefer to answer clicker questions
- a) without discussion with classmates
  - b) after discussion with classmates
  - c) first by myself, then again, after discussion with classmates

***Problems with Clicker Use***

- 10) Did you have any problems registering your clicker?
- a) yes, I had trouble using the eInstruction website
  - b) yes, I had trouble paying for it online
  - c) no
- 11) Did you have problems getting your clicker to work in class?
- a) no, it worked every time
  - b) I had problems 1 or 2 days
  - c) I had problems 3 to 5 days
  - d) I had problems on more than 5 days

***Study Preference***

- 12) As you study for an exam, do you prefer to
- a) work on your own
  - b) work with 2 or 3 students
  - c) work with 4 or more students
